# Supplementary material for: Understanding the evolution of tunable spiral threads in homochiral Au nano-screws
Source: Royal Society of Chemistry journal article supplement (doi:10.1039/d2qi00396a), 2022-01-01
Supplement: d2qi00396a1.pdf [file d2qi00396a1.pdf]

## Supporting Information for

# Understanding the evolution of tunable spiral threads in homochiral Au nano-screws

Shenghao Yang,<sup>a</sup> Hongyan Li,<sup>a</sup> Ruirui Liu,<sup>b</sup> Cheng Wang,<sup>b</sup> Jialong Yu,<sup>a</sup> Shumin Li,<sup>a</sup> Yawen Wang,<sup>\*a</sup>  
and Hongyu Chen<sup>\*a,c</sup>

<sup>1</sup> Institute of Advanced Synthesis (IAS), and School of Chemistry and Molecular Engineering, Jiangsu National Synergetic Innovation Centre for Advanced Materials, Nanjing Tech University, Nanjing, 211816, China.

<sup>2</sup> Institute for New Energy Materials and Low-Carbon Technologies, School of Materials Science and Engineering, Tianjin Key Laboratory of Advanced Functional Porous Materials, Tianjin University of Technology, Tianjin, 300384, China.

<sup>3</sup> Present address: School of Science, Westlake University, Hangzhou, 310023, China; Institute of Natural Sciences, Westlake Institute for Advanced Study, Hangzhou 310024, China.

\*E-mail: [ias\\_ywwang@njtech.edu.cn](mailto:ias_ywwang@njtech.edu.cn); [chenhongyu@westlake.edu.cn](mailto:chenhongyu@westlake.edu.cn)

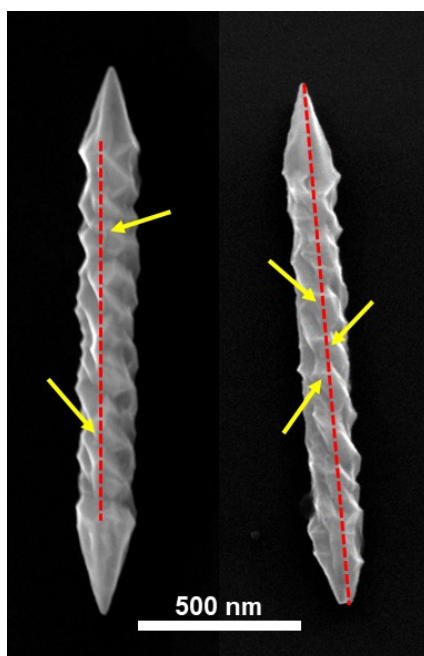

**Fig. S1** Magnified SEM images of the Au nano-screws synthesized with L-cysteine as the ligand. The red dash lines indicate the grain boundaries and the yellow arrows indicate the continuous structures across the grain boundaries.

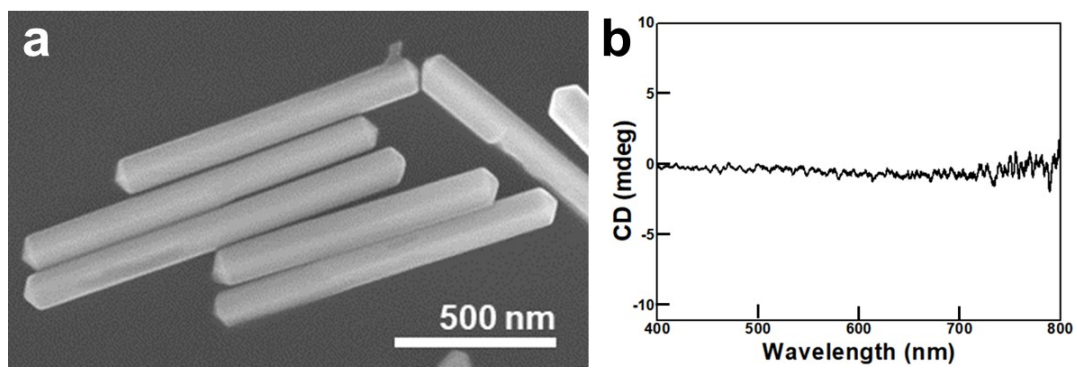

**Fig. S2** (a) SEM image and (b) CD spectrum of the enlarged Au nanorods formed in absence of the L-cysteine ligand.

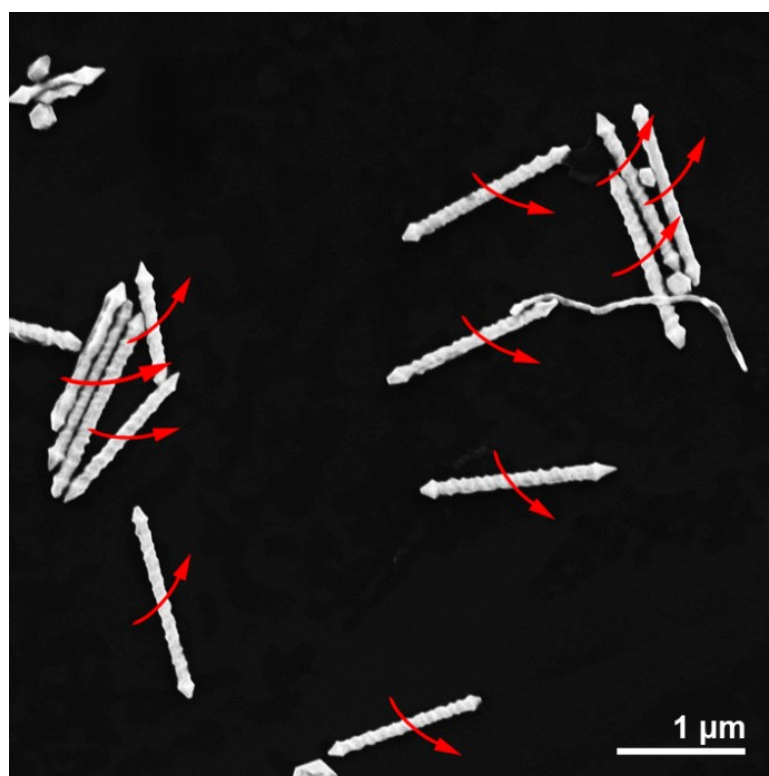

**Fig. S3** SEM image of the nano-screws formed with D-cysteine as the ligand.

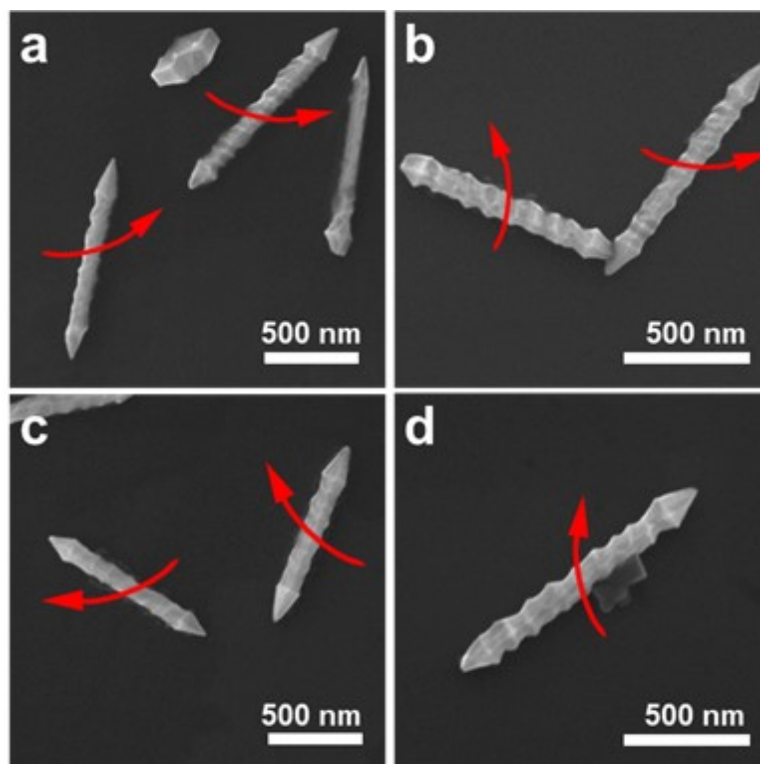

**Fig. S4** SEM images of the nano-screws formed with  $0.17 \mu\text{M}$  mixed L- and D-cysteine, with the ratio of a) 1: 9, b) 1: 5, c) 11: 4, and d) 5: 1.

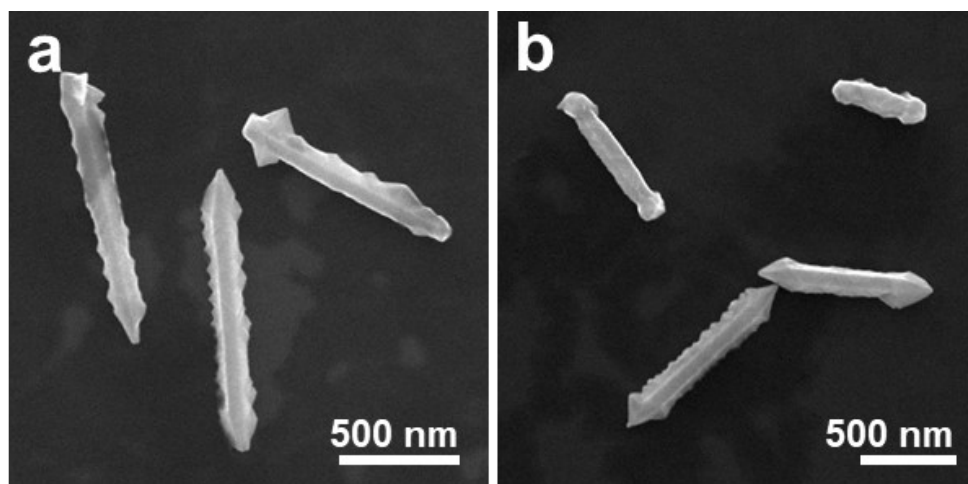

**Fig. S5** SEM images of the nanostructures formed by replacing L-cysteine with (a)  $0.20 \mu\text{M}$  L-glutathione and (b)  $2.0 \mu\text{M}$  N-acetyl-L-cysteine.

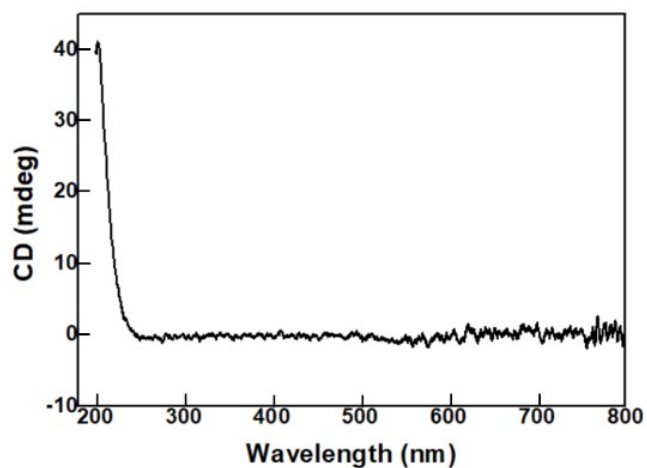

**Fig. S6** CD spectrum of 1.0 mM L-cysteine.

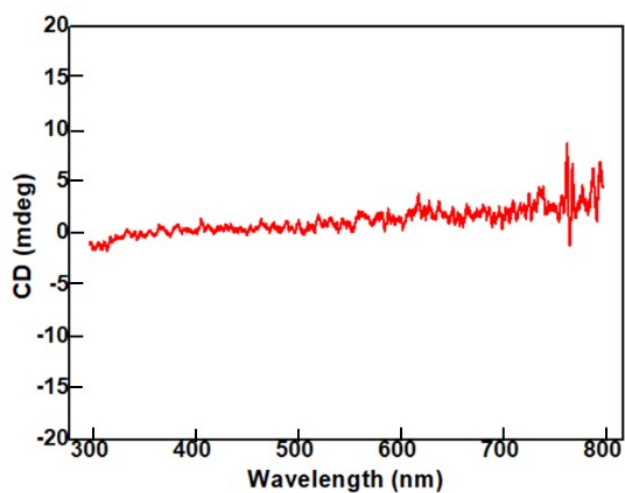

**Fig. S7** CD spectrum of the Au nanorods with L-cysteine adsorbed on the surface.

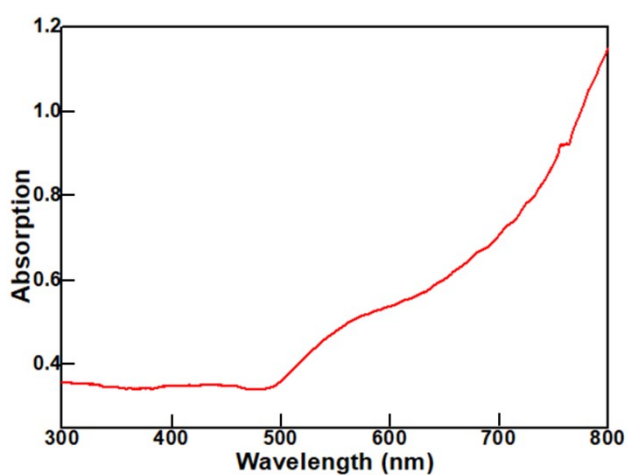

**Fig. S8** The ultraviolet data of typical Au nano-screws (0.17  $\mu$ M L-cysteine).

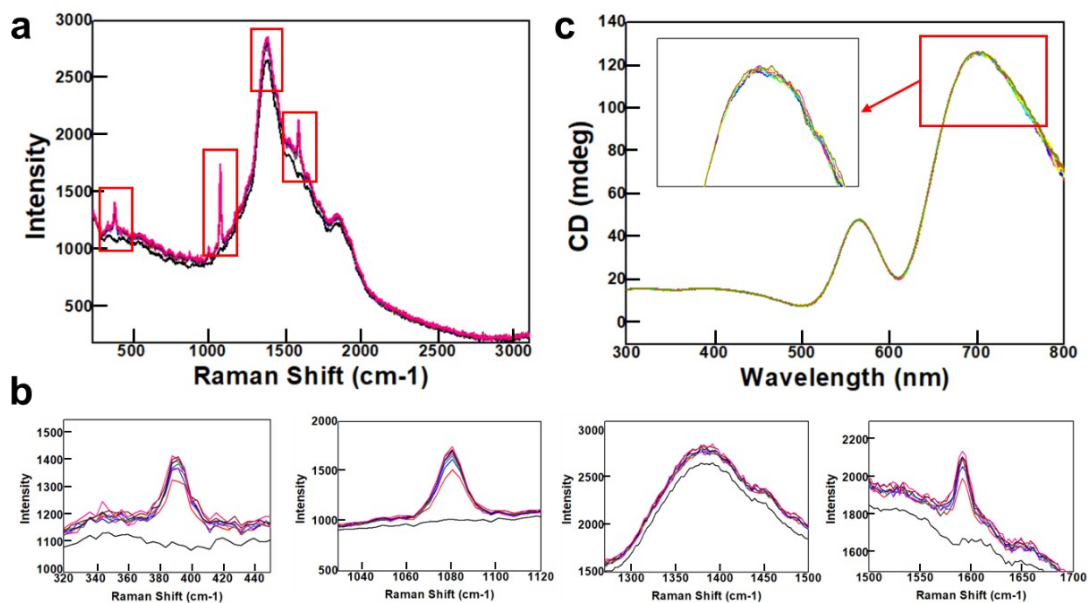

**Fig. S9** SERS intensity (a-b) and CD spectra (c) of Au nano-screws when L-cysteine was gradually replaced by 4-aminobenzophenol over time.

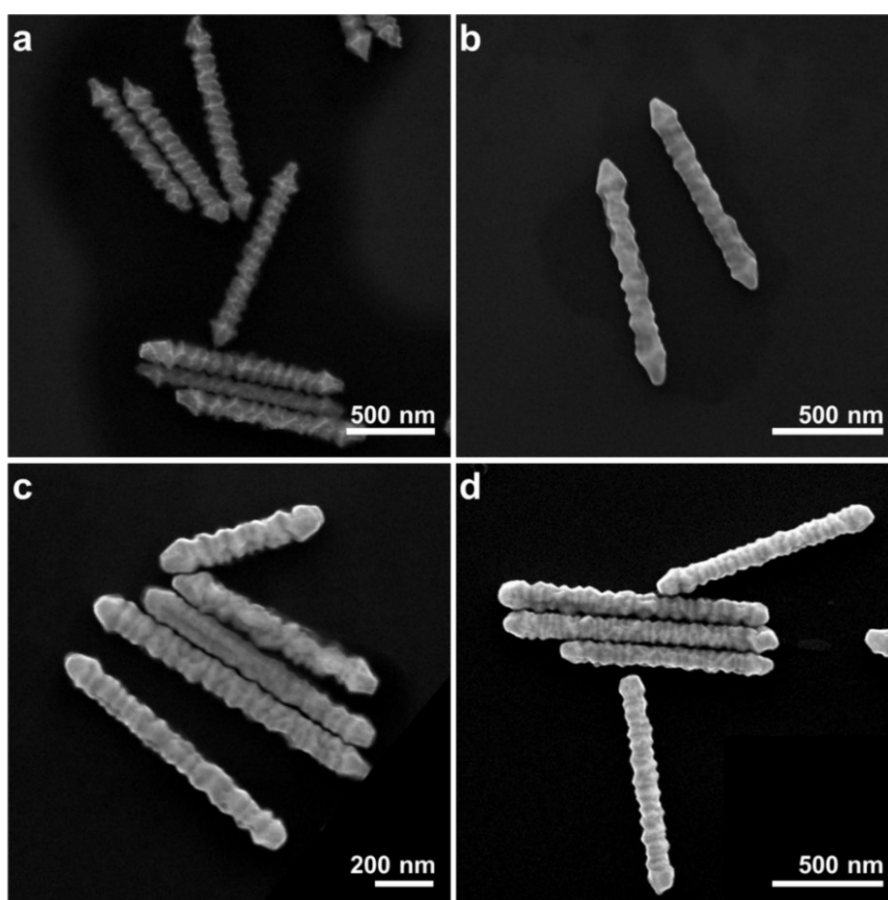

**Fig. S10** SEM images of the nano-screws formed with a) 0.29  $\mu\text{M}$ , b) 0.40  $\mu\text{M}$ , c) 0.60  $\mu\text{M}$ , and d) 0.80  $\mu\text{M}$  L-cysteine.

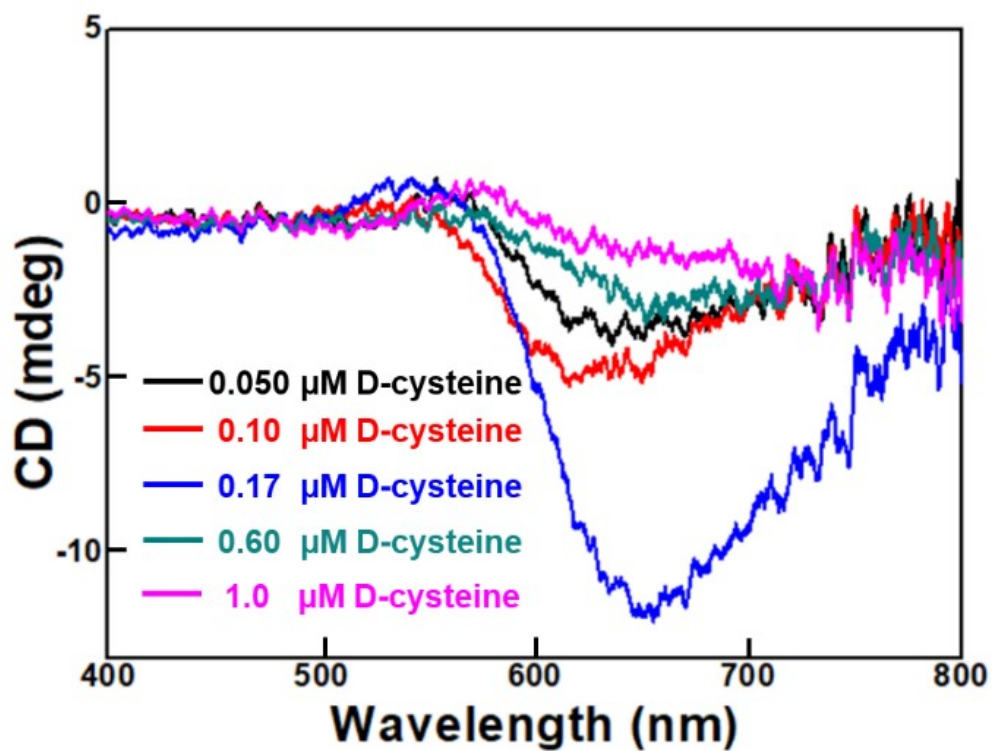

**Fig. S11** CD spectra of the nano-screws formed with different concentrations of D-cysteine.

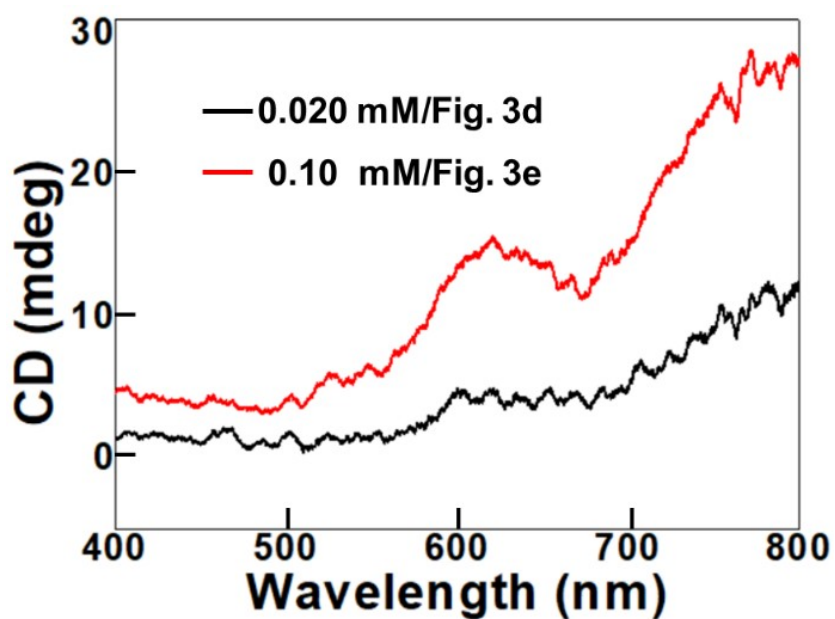

**Fig. S12** CD spectrum of the nano-screws formed with different concentration of HAuCl<sub>4</sub>.



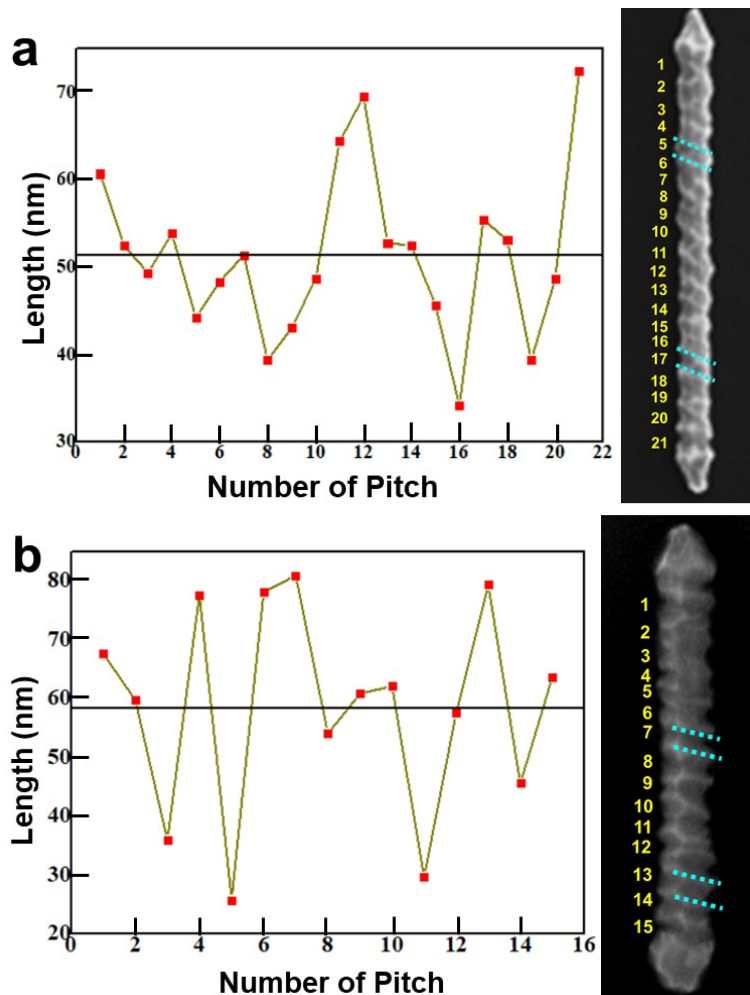

**Fig. S13** A continuous variation about the pitch length on one chiral Au nano-screw formed with (a) 0.020 mM HAuCl<sub>4</sub> and (b) 0.29 μM L-cysteine.
